# 1 Direct cochlear recordings show human hearing nerve 2 activity is modulated by selective attention

3 Gehmacher, Q.<sup>1,2\*</sup>†, Reisinger, P.<sup>1,2</sup>†, Hartmann, T.<sup>1,2</sup>, Keintzel, T.<sup>3</sup>, Rösch, S.<sup>4</sup>, Schwarz, K.<sup>5</sup>,  
4 Weisz, N<sup>1,2</sup>

5 <sup>1</sup>Centre for Cognitive Neuroscience, University of Salzburg, 5020 Salzburg, Austria

6 <sup>2</sup>Department of Psychology, University of Salzburg, 5020 Salzburg, Austria

7 <sup>3</sup>Department of Otorhinolaryngology, Klinikum Wels-Grieskirchen GmbH, 4600 Wels, Austria

8 <sup>4</sup>Department of Otorhinolaryngology, Head and Neck Surgery, Paracelsus Medical University  
9 Salzburg, 5020 Salzburg, Austria

10 <sup>5</sup>MED-EL GmbH, 6020 Innsbruck, Austria

11 †These authors contributed equally to this work.

12 \*Corresponding author: [quirin.gehmacher@sbg.ac.at](mailto:quirin.gehmacher@sbg.ac.at)

## 13 Abstract

14 The architecture of the efferent auditory system enables prioritization of strongly overlapping  
15 spatiotemporal cochlear activation patterns elicited by relevant and irrelevant inputs. So far,  
16 attempts at finding such attentional modulations of cochlear activity delivered indirect insights in  
17 humans or required direct recordings in animals. The extent to which spiral ganglion cells  
18 forming the human hearing nerve are sensitive to selective attention remains largely unknown.  
19 We investigated this question by testing the effects of attending to either the auditory or visual  
20 modality on human hearing nerve activity that was directly recorded with standard commercial  
21 MED-EL cochlear implants (CI) during a stimulus-free (anticipatory) cue-target interval. When  
22 attending the upcoming auditory input, ongoing hearing nerve activity within the theta range (5-8  
23 Hz) was enhanced. Crucially, using the broadband signal (4-25 Hz), a classifier was even able  
24 to decode the attended modality from single-trial data. Follow-up analysis showed that the effect  
25 was not driven by a narrow frequency in particular. Using direct cochlear recordings from deaf  
26 individuals, our findings suggest that cochlear spiral ganglion cells are sensitive to top-down

27 attentional modulations. Given the putatively broad hair-cell degeneration of these individuals,  
28 the effects are likely mediated by alternative efferent pathways as compared to previous studies  
29 using otoacoustic emissions. Successful classification of single-trial data could additionally have  
30 a significant impact on future closed-loop CI developments that incorporate real-time  
31 optimization of CI parameters based on the current mental state of the user.

32 *Keywords:* auditory, cochlear implants, hearing nerve, selective attention, top-down

### 33 **Introduction**

34 Attention describes a process by which sensory information can be prioritized. For all sensory  
35 modalities common spatiotemporal neural activity patterns have been reported on a cortical  
36 level, normally involving relevant sensory cortical regions (Frey et al., 2014; Haegens et al.,  
37 2011; Händel et al., 2010; Mazaheri et al., 2014; Salo et al., 2017; Weise et al., 2016) as well as  
38 higher level processing regions in frontal or parietal areas (Gazzaley & Nobre, 2012; Jackson et  
39 al., 2016; Nelissen et al., 2013; Weise et al., 2016; Woolgar et al., 2015). These studies suggest  
40 that selective attention is partially supported by modality-independent mechanisms. However, in  
41 contrast to e.g. the visual modality, the auditory system comprises a unique complex network of  
42 subcortical regions which all receive structural top-down connections originating in the auditory  
43 cortex (Chandrasekaran & Kraus, 2010; Elgueda & Delano, 2020; Suga, 2008; Terreros &  
44 Delano, 2015; Winer, 2006). By the most direct path, top-down information can reach the  
45 cochlea via only one extra relay through the superior olivary complex (SOC). Thus, cochlear  
46 activity can in principle be altered by top-down signals from the auditory cortex. However,  
47 studying peripheral auditory functioning requires special recording and analysis techniques  
48 (Elgueda & Delano, 2020) and has therefore been rarely investigated in this regard.

49 Noninvasively, evidence in humans comes from studies on otoacoustic emissions (OAEs),  
50 sounds that are generated by outer hair cell (OHC) activity in the cochlea. Activity of OHCs are  
51 modulated by a pathway from the medial olivocochlear (MOC) system that itself originates in the  
52 superior olivary complex (SOC). Spiral ganglion cells making up the auditory-nerve fibers are  
53 mainly innervated by connections of the lateral olivocochlear complex (LOC) respectively  
54 (Elgueda & Delano, 2020; Warr & Guinan, 1979). Attentional modulations of OAEs can thus be  
55 seen as a proxy for subcortical attentional modulations and have been reported for either  
56 attending the left or the right ear (Giard et al., 1994) when one out of two frequencies was task

57 relevant (Maison et al., 2001) or attention had to be focused on the visual or auditory modality  
58 (Dragicevic et al., 2019; Wittekindt et al., 2014). Recent work by our group (Köhler et al., in  
59 press) showed that in an audiovisual attention task cochlear activity is even modulated during a  
60 stimulus-free cue-target period, with enhanced theta-rhythmicity (~6 Hz) of spontaneous  
61 otoacoustic activity when attending to upcoming auditory input. Yet, OAEs only deliver indirect  
62 insights into the extent of the efferent auditory pathway via MOC synapses and are prone to  
63 artifacts (Francis et al., 2018). Further evidence for attention modulations of cochlear activity  
64 stems from direct recordings in animals. Delano et al. (2007) reported cochlear microphonic  
65 (CM) increases, a measure of OHC activity, together with reductions of auditory-nerve  
66 compound action potentials (CAP) in chinchillas during selective attention to visual stimuli.  
67 These effects were directly recorded with chronically implanted round-window electrodes and  
68 were later attributed to activation of MOC neurons, since electrical stimulation of MOC fibers  
69 produced opposite effects in CAP and CM amplitudes (Elgueda et al., 2011). However, whether  
70 *human* hearing nerve activity can be directly modulated via selective attention is still unknown.

71 While direct recordings are normally not feasible in humans, cochlear implants (CI) provide a  
72 unique opportunity for recording hearing nerve activity. CIs restore hearing by directly applying  
73 electrical stimulation to hearing nerve fibers inside the cochlea. However, the CI electrodes are  
74 used to measure hearing nerve responses to short biphasic pulses to assure hearing nerve and  
75 device functioning during and after surgery (Miller et al., 2008; Ramekers et al., 2014). These so  
76 called electrically evoked compound action potentials (ECAPs) show a first negative N1 and a  
77 second positive P1 peak (Abbas et al., 1999; He et al., 2017; Kim et al., 2010; Stypulkowski &  
78 van den Honert, 1984) within the first ~0.2 ms, corresponding to wave I of the auditory  
79 brainstem response (ABR; Christov et al., 2016), and can be measured with any conventional  
80 CI. However, the well established effects of selective attention on a cortical (Frey et al., 2014;  
81 Haegens et al., 2011; Händel et al., 2010; Mazaheri et al., 2014; Salo et al., 2017; Weise et al.,  
82 2016), as well as those reported for (corticofugal) modulations of OAEs (Dragicevic et al., 2019;  
83 Köhler et al., in press) on a cochlear level were reflected in slow oscillatory activity <30 Hz that  
84 cannot be measured with standard short-latency ECAPs. Assuming as a working hypothesis  
85 that human hearing nerve activity is modulated in a similar frequency range by selective  
86 attention, our approach appended short recording windows in a stimulus-free cue-target period.  
87 This technique allows for discrete sampling of that period within a single trial that can later be  
88 processed like standard electroencephalographic (EEG) recordings, for example, to obtain

89 modulations of ongoing activity in relation to attention. Interestingly, CI recipients lack the  
90 efferent MOC reflex that leads to cochlear dynamic compression in normal hearing  
91 (Lopez-Poveda et al., 2016), suggesting damaged MOC-OHC connections after substantial  
92 hair-cell degeneration. Therefore, aforementioned CI recordings during selective attention  
93 should mostly reflect modulations of spiral ganglion cell activity via LOC synaptic connections.  
94 Using an audiovisual crossmodal attention task adapted from Hartmann and Weisz (2019, see  
95 **Figure 1**), we show that ongoing hearing nerve activity in a stimulus-free cue-target interval is  
96 modulated by focused attention using standard commercial MED-EL CIs as recording devices.  
97 In addition to this average condition-level effect, we show that a classifier is even able to decode  
98 attended modality on a single-trial basis, which could additionally have important implications for  
99 the use of conventional CIs in a closed-loop system.

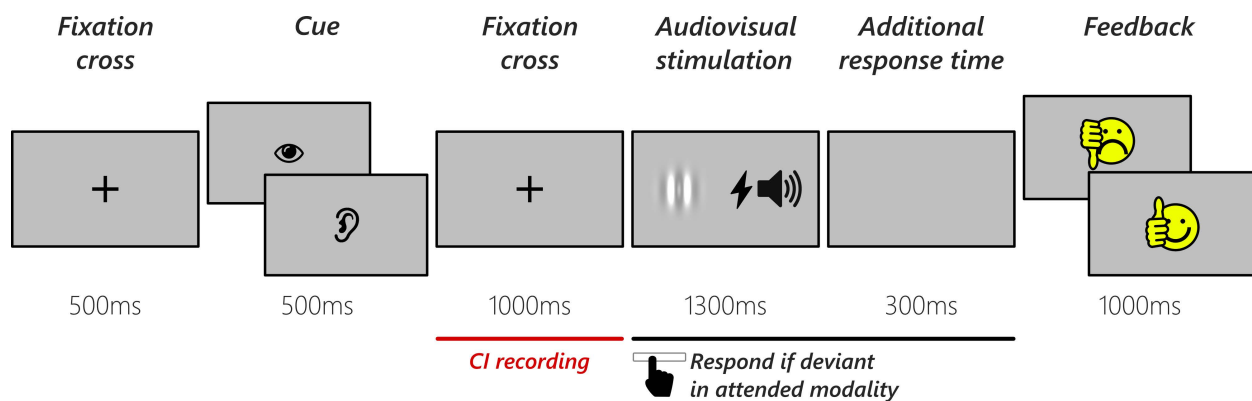

100 **Figure 1.** Schematic illustration of the crossmodal attention task. Each trial started with a fixation cross,  
101 followed by a cue indicating either to attend the visual or auditory domain. A second fixation cross  
102 appeared and an auditory and visual stimulus were presented afterwards. When the stimulus in the  
103 attended modality was deviant (visual: gabor patch tilt, auditory: oddball sound), participants had to  
104 respond by pressing the spacebar. The additional response time accounted for trials where the gabor  
105 patch tilted towards the end of the stimulation. At the end of each trial, feedback was given in the form of  
106 a smiley face. The red line denotes the time window where hearing nerve activity was recorded via the CI.

## 107 Results

108 Sixteen CI users performed a crossmodal attention task (similar to Hartmann & Weisz, 2019)  
109 where attention had to be focused on an upcoming auditory or visual stimulus (see **Figure 1**).  
110 Hearing nerve activity was recorded directly via one of their standard CI electrodes in the  
111 stimulus-free cue-target interval. We calculated the power spectral density of the signal and

112 compared the two conditions (attend auditory vs. visual) in the theta and alpha band.  
113 Afterwards, a classifier was utilized to decode the attended modality on a single-trial basis using  
114 the broadband signal and frequency bands typically associated with selective attention (theta,  
115 alpha, beta).

#### 116 *Behavioral results*

117 Participants gave a correct response in 96% ( $SD = 2.7\%$ ) of all trials. The number of correct  
118 trials did not differ significantly between the two conditions, according to a dependent sample  
119 t-test (auditory:  $M = 245$  ( $SD = 9.8$ ); visual:  $M = 242$  ( $SD = 8.8$ );  $t(15) = 1.32$ ,  $p = 0.21$ ,  $d = 0.33$ ).  
120 When there was an oddball in the cued domain, a correct response was given in 75% ( $SD =$   
121  $19.0\%$ ) of the trials. In the auditory condition, the percentage of correct oddball trials was 72%  
122 ( $SD = 30.8\%$ ) and in the visual condition 78% ( $SD = 14.2\%$ ). Overall, the behavioral findings  
123 suggested that participants performed the task in a compliant manner.

#### 124 *Human hearing nerve activity is modulated by selective attention*

125 In a first analysis step, we calculated the broadband PSD from 4-25 Hz, separately for each  
126 condition (attend auditory/attend visual). The resulting power spectra (see **Figure 2A**) by  
127 themselves showed no clear peaks, however the grand average condition contrast spectrum  
128 indicates differences that are mainly centered in distinct frequency ranges. Based on previous  
129 OAE and M/EEG work (Köhler et al., in press; Mazaheri et al., 2014), we statistically compared  
130 the two conditions in the theta (averaged between 5-8 Hz) and alpha frequency band (averaged  
131 between 9-13 Hz; **Figure 2B**). A cluster-based permutation test in the theta frequency band  
132 showed that prestimulus power is higher when attending the auditory domain ( $p = 10.00e^{-05}$ ,  $d =$   
133  $0.49$ ). No cluster was found in the alpha frequency band ( $p = 1.00$ ,  $d = 0.20$ ). Given the  
134 distribution of the individual average power in both FOI, a rather high interindividual variability  
135 can be seen.

136 The results so far showed that selective attention modulates directly recorded cochlear activity,  
137 with the effect being in particular pronounced in the theta frequency range: attending to an  
138 upcoming auditory stimulus resulted in higher power recorded from the CI electrode.

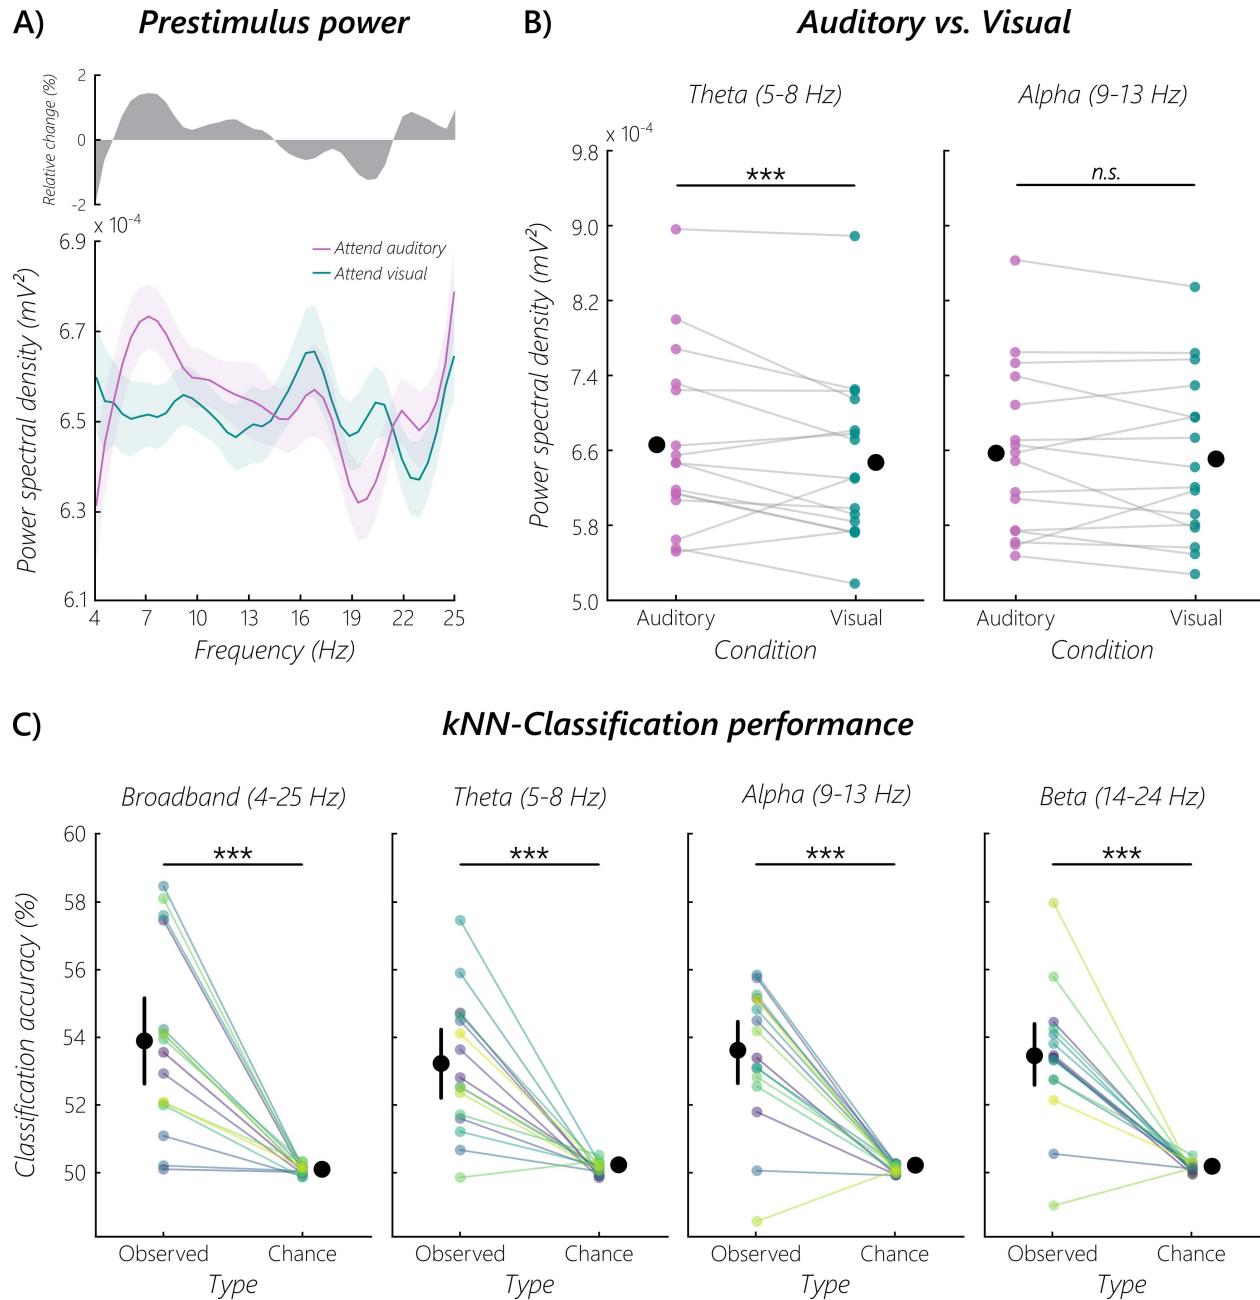

139 **Figure 2. Prestimulus power modulations and decoding of selective attention.** (A) Grand average  
 140 prestimulus power spectra from 4-25 Hz when attending the auditory or visual domain. The top panel  
 141 indicates the relative change between the auditory and visual domain. The shaded areas in the bottom  
 142 panel represent the standard error of the mean for within-subjects designs (O'Brien & Cousineau, 2014).  
 143 (B) Average prestimulus power in the theta and alpha band, separated by the two conditions. Black dots  
 144 indicate the group mean for the respective condition. A cluster-based permutation test in the averaged  
 145 theta FOI resulted in a statistically significant difference when testing the hypothesis that performance is  
 146 higher when attending the auditory domain ( $p = 10.00e^{-05}$ ,  $d = 0.49$ ). No cluster was found in the alpha  
 147 band ( $p = 1.00$ ,  $d = 0.20$ ). The asterisks indicate a statistically significant difference (n.s. = not significant).  
 148 (C) A kNN-Classifier was used to decode attended modality from single-trial prestimulus power spectra.  
 149 Resulting *Observed* accuracies were contrasted with respective *Chance* levels of a random permutation



150 test for all FOI. Contrasts revealed significant ( $p < 0.001$ ) decoding performance throughout spectra with  
151 fairly similar effects (broadband:  $t(15) = 5.60$ ,  $p = 2.60e^{-05}$ ,  $d = 1.96$ ; theta:  $t(15) = 5.83$ ,  $p = 1.70e^{-05}$ ,  $d =$   
152 2.11; alpha:  $t(15) = 6.78$ ,  $p = 3.00e^{-06}$ ,  $d = 2.34$ ; beta:  $t(15) = 6.40$ ,  $p = 6.00e^{-06}$ ,  $d = 2.33$ ) on a group level  
153 (represented by black dots; error bars = 95% CI). However, on a single-subject level the attention effect  
154 was most pronounced for individually specific FOI, resulting in significant above chance decoding for 12  
155 out of 16 subjects. Every subject is represented by the same color in all four FOI columns.

### 156 *Attended modality can be decoded from single-trial CI recordings*

157 We used prestimulus power spectra for a kNN-Classifer to show that attention modulation of  
158 ongoing hearing nerve activity in humans is even reflected in single-trial CI recordings. To  
159 ensure that the classifier was able to differentiate hearing nerve activity when attending the  
160 auditory compared to the visual domain in general, we calculated a t-test between *Observed*  
161 classification accuracies and respective *Chance* levels of broadband power spectra, showing  
162 that this attention effect was decodable significantly above chance ( $t(15) = 5.60$ ,  $p = 2.60e^{-05}$ ,  $d =$   
163 1.96; **Figure 2C**). Given the significant difference over a broad frequency range, we were further  
164 interested in whether this attention effect was driven by one of the FOI usually connected with  
165 selective attention in OAE and M/EEG studies. We therefore calculated a two-factor repeated  
166 measures ANOVA to compare the effect of selective attention on kNN-Classification accuracy  
167 for different FOI (broadband, theta, alpha, beta) and Types (*Observed*, *Chance*). Results show  
168 no significant effect of FOI ( $F(3, 45) = 0.37$ ,  $p = 0.78$ ,  $\eta_p^2 = 0.02$ ), yet show a significant effect for  
169 *Observed* vs. *Chance* accuracies ( $F(1, 15) = 136.55$ ,  $p = 6.21e^{-09}$ ,  $\eta_p^2 = 0.90$ ), with higher  
170 accuracies for *Observed* ( $M = 0.53$ ) than *Chance* ( $M = 0.50$ ) levels. No FOI x Type interaction  
171 on decoding results was found ( $F(3, 45) = 0.36$ ,  $p = 0.78$ ,  $\eta_p^2 = 0.02$ ). As a main effect of Type  
172 and no interaction of FOI x Type indicated that selective attention can be decoded from all FOI  
173 separately, in addition we computed three t-tests for theta, alpha, and beta bands contrasting  
174 respective *Observed* and *Chance* levels. For all three FOI a significant difference was found for  
175 selective attention decoding (theta:  $t(15) = 5.83$ ,  $p = 1.70e^{-05}$ ,  $d = 2.11$ ; alpha:  $t(15) = 6.78$ ,  $p =$   
176  $3.00e^{-06}$ ,  $d = 2.34$ ; beta:  $t(15) = 6.40$ ,  $p = 6.00e^{-06}$ ,  $d = 2.33$ ; **Figure 2C**). Additionally, random  
177 permutation tests of kNN classification within all four different FOI gave insights into  
178 single-subject decoding performance across the different frequency spectra. Independent of  
179 FOI, an overall number of 12 subjects (i.e. 75% of the sample) showed significant ( $p < 0.05$ )  
180 above chance decoding of focused attention during the stimulus-free cue-target interval.

## 181 Discussion

182 The efferent auditory system comprises a complex arrangement of subcortical and peripheral  
183 pathways where - uniquely among the senses - the cochlear activity can be altered by top-down  
184 signals from the auditory cortex via the SOC (Chandrasekaran & Kraus, 2010; Elgueda &  
185 Delano, 2020; Suga, 2008; Terreros & Delano, 2015; Winer, 2006). Profound evidence supports  
186 the notion of altered oscillatory neural activity by selective attention on a cortical level (Frey et  
187 al., 2014; Haegens et al., 2011; Händel et al., 2010; Mazaheri et al., 2014; Salo et al., 2017;  
188 Weise et al., 2016), prioritizing attended over unattended events in the environment which is  
189 predominantly reflected in modulations within the alpha band (~9-13 Hz; Frey et al., 2014;  
190 Sauseng et al., 2005; for a review see Foxe & Snyder, 2011; notably also Antonov et al., 2020  
191 that challenges current views). While such changes have also been reported for the auditory  
192 cortex (Weisz et al., 2011), much less is known for subcortical structures along the efferent  
193 pathway. This is in particular the case when it comes to the *human* cochlea as special recording  
194 and analysis techniques are required (Elgueda & Delano, 2020). So far, investigating attentional  
195 modulation of cochlear activity in humans had to rely on indirect recordings of OAEs; a  
196 noninvasive approach for measuring OHC activity that receives modulatory signals from the  
197 SOC through its medial neurons (MOC). Recent evidence suggests slow modulations of  
198 cochlear activity when attention had to be focused on the auditory modality. Dragicevic et al.  
199 (2019) were the first ones to establish attention-related modulations of distortion product OAE  
200 (DPOAE) activity in a low (<10 Hz) frequency range. Going beyond these stimulus-evoked  
201 changes, even when no auditory stimulus is presented, cochlear activity is enhanced in an  
202 analogous frequency range as shown by Köhler et al. (in press). These striking results provide  
203 substantial evidence for a notable role of selective attention at the very first stages of sound  
204 processing in the human auditory system. However, in addition to an indirect measurement  
205 approach that is prone to artifacts (Francis et al., 2018), studying OAEs cannot address direct  
206 modulation of hearing nerve activity since spiral ganglion cells are efferently innervated by a  
207 separate pathway. To our knowledge, this attentional modulation via the LOC remains  
208 completely unknown as direct recordings of hearing nerve activity are normally not feasible in  
209 humans. Given the damage to OHCs and their connections to the MOC in CI recipients  
210 (Lopez-Poveda et al., 2016) potential alterations of respective hearing nerve activity in a  
211 selective attention paradigm should largely reflect top-down signals from the LOC. Our results,  
212 contrasting direct cochlear recordings during auditory and visual attention, show that ongoing



213 hearing nerve activity is top-down modulated, putatively suggesting a role of the LOC pathway  
214 in selective attention.

215 While cortical and OAE-based measures suggest attention-related effects in distinct frequency  
216 bands (Köhler et al., in press; Mazaheri et al., 2014), our results are mixed in this respect. The  
217 broadband frequency analysis of the prestimulus interval showed no clear peaks (**Figure 2A**).  
218 This, however, may also be the result of low signal-to-noise ratios (SNRs), as commercial CIs  
219 are so far not optimized to do these kinds of continuous electrophysiological recordings. Indeed  
220 a grand average of the condition differences points to maximal effects in a frequency range  
221 overlapping with the one reported by Köhler et al. (in press). When analyzing the prestimulus  
222 power spectra in two FOI (theta and alpha), we found a selective attention effect in theta  
223 resulting in enhanced power while attending to the auditory modality (**Figure 2B**). This result  
224 corroborates our previous finding using a similar paradigm, where ongoing OAEs in the theta  
225 band (~6 Hz) were enhanced while attending an upcoming auditory stimulus (Köhler et al., in  
226 press). We found no selective attention effect in the alpha band in concordance with  
227 aforementioned studies of otoacoustic activity. It is therefore possible that this frequency band  
228 does not play a central role in selective attention at the peripheral level. Further studies with an  
229 optimized recording setup will be necessary to address this issue.

230 Building upon conventional analyses of condition-level fast Fourier transform (FFT) averages,  
231 we decided to use single-trial frequency spectra to classify anticipatory attentional focus during  
232 the stimulus-free cue-target period. With this approach we aimed to get more detailed insight  
233 into fine-grained differences between attentional states coded within modulations of direct  
234 cochlear recordings that could be missed by condition-level averaging approaches and indirect  
235 OAE measurements. Strikingly, classification of the broadband signal (4-25 Hz) revealed  
236 significantly improved differentiation of attended modality compared to the average  
237 condition-level effect of the FFT results (**Figure 2C**). There seems to be sufficient top-down  
238 modality specific information entailed in single-channel CI recordings to ensure above chance  
239 classification performance without even specifying a particular attention-related frequency band  
240 - a clear improvement to the standard FFT approach. As a matter of fact, follow-up analysis  
241 showed that the performance was not driven by one of three FOI (theta, alpha, beta) usually  
242 associated with selective attention, but instead it revealed that the contribution of each of these  
243 frequency bands to broadband classification was fairly similar. However, the decoding approach  
244 allowed for additional insight into single-subject classification performance and showed high

245 interindividual variability in terms of an optimal spectral frequency band. It remains to be  
246 determined whether this effect is driven by local idiosyncrasies at the peripheral level (e.g.  
247 synaptic connections between LOC and spiral ganglion cells) or even involves particular activity  
248 patterns at higher hierarchical levels. Independent of the precise origins of our effects observed  
249 at the hearing nerve, the decoding results open up avenues to future developments towards  
250 closed-loop CIs that incorporate mental states of the recipient reflected in cochlear activity into  
251 adaptive stimulation in real time. Attempts so far with standard modern CIs required exhaustive  
252 recording and analysis sessions and indicated additional hard- and software modifications (Mc  
253 Laughlin et al., 2012) in order to extract meaningful neuronal activity with additional  
254 extracochlear (i.e. EEG) electrodes, especially for real time applications. In the present study,  
255 we used standard commercial MED-EL CIs to record ongoing activity directly at the hearing  
256 nerve during a stimulus-free anticipatory cue-target interval without additional electrodes or  
257 implantations. As we show, a classifier could use the frequency information of this signal to  
258 anticipate the attentional state of the recipient. Future research will need to address which  
259 cognitive states can be decoded directly at the hearing nerve and how this information could be  
260 exploited in a closed-loop CI setup.

261 This study shows that individuals with a CI form a model population to deepen our  
262 understanding of how cognition can lever the efferent auditory system to modulate auditory  
263 input at the earliest stages of processing. In the present study we focused on stimulation-free  
264 anticipatory cue-target periods using a popular experimental setup in cognitive neuroscience  
265 (Hartmann & Weisz, 2019; Köhler et al., in press; Posner, 1980; Wittekindt et al., 2014). The  
266 extent to which the identified top-down modulations also play a role in more complex  
267 environments with natural speech, for example in attending one of multiple speakers at a  
268 “cocktail-party”, should be addressed in further studies and could add valuable information to an  
269 ongoing debate on speech processing in such scenarios. As CI recipients show highly varying  
270 listening success in multitalker situations (Loizou et al., 2009), their ability to (re-)engage the  
271 path from the LOC to auditory-nerve fibers in selective processing could play a key role in  
272 coping post-operatively with those situations. Future studies could combine our direct cochlear  
273 recording approach with EEG-based measurements of cortical modulations during selective  
274 attention. However, so far technical restrictions by the device itself (Abbas et al., 2017;  
275 Campbell et al., 2015; Tejani et al., 2019) and superimposing artifacts that would be caused by  
276 the stimulation with complex sounds like speech don’t allow researchers to use CI electrodes for

277 simultaneous stimulation and recording of hearing nerve activity and needed to be optimized for  
278 such continuous applications in future developments. Nonetheless, our approach shows that  
279 ongoing hearing nerve activity contains relevant and, crucially, classifiable information about  
280 current attentional status that could be used to adapt the CI's processing strategy, resulting in  
281 less fatigue and higher intelligibility during challenging listening situations.

282 In summary, to the best of our knowledge our study is the first to investigate attentional effects  
283 on activity recorded directly from the hearing nerve in humans. We confirm and extend previous  
284 indirect measurements, suggesting attentional modulations in the theta frequency range.  
285 Importantly, we also show that selective attention can be decoded above chance at a single-trial  
286 and even individual level. Previous reports on attentional modulations of cochlear activity relied  
287 on OAEs, which are driven by the MOC pathway. Our results strongly suggest that the LOC  
288 pathway can also be exploited in a top-down down fashion to affect spiral ganglion cells directly.

## 289 **Materials and Methods**

### 290 *Participants*

291 21 right-handed CI users (4 females,  $M_{\text{age}} = 57.5$ ,  $SD_{\text{age}} = 11.9$ ) participated in the study, all with  
292 a minimum CI experience of six months. Participants were recruited via the ENT departments of  
293 the hospitals in Salzburg ( $n = 10$ ) and Wels-Grieskirchen ( $n = 11$ ). Three participants were  
294 excluded because of a too weak contact between transmitting CI coil and receiver that was  
295 required for the study. One participant showed no N1 in recorded ECAPs, which could indicate a  
296 measurement problem and was therefore excluded. One participant quit during the session due  
297 to concentration problems. This led to a final sample size of 16 participants (3 females,  $M_{\text{age}} =$   
298  $53.8$ ,  $SD_{\text{age}} = 12.0$ ; see Table S1 for further details). All participants reported no previous  
299 neurological or psychiatric disorders, and reported normal or corrected-to-normal vision. All  
300 participants signed an informed consent and were reimbursed with 10 Euro per hour. The  
301 experimental protocol was approved by the ethics committee of the University of Salzburg and  
302 was carried out in accordance with the Declaration of Helsinki.

### 303 *Stimuli and Procedure*

304 The experimental procedure was implemented in MATLAB 8.6 (The MathWorks Inc., Natick,  
305 Massachusetts, USA) using custom scripts. Presentation of visual stimuli and response

306 collection was achieved with a previous version (th\_ptb; [https://gitlab.com/thht/th\\_ptb](https://gitlab.com/thht/th_ptb)) of the  
307 Objective Psychophysics Toolbox (o\_ptb; Hartmann & Weisz, 2020), which adds an additional  
308 class-based abstraction layer in addition to the Psychophysics Toolbox (Version 3.0.14;  
309 Brainard, 1997; Kleiner et al., 2007; Pelli, 1997). Cochlear stimulation as well as recording was  
310 performed via the MAX Programming Interface, a device which is part of the clinical standard  
311 setup that enables control of the implant, together with the Research Interface Box 2  
312 Dynamic-link library (RIB2 DLL provided by the University of Innsbruck, Innsbruck, AT; Litovsky  
313 et al., 2017). To ensure accurate stimulus presentation and triggering, timings were measured  
314 with the Black Box ToolKit v2 (The Black Box ToolKit Ltd., Sheffield, UK).

315 Participants were seated in front of a computer screen and were asked to remove their CI  
316 processor and coil to replace it with a coil connected to the MAX Programming Interface. For  
317 bilateral CI users, the side with the better subjective hearing performance and/or longer  
318 implantation date was used (see Table S1). Primarily the CI coil model MAX Coil was used, but  
319 if the magnet was too weak to ensure a stable connection, the CI coil model MAX Coil S was  
320 used. As a first step, the individual electrical hearing threshold was determined with a standard  
321 tone with a stimulation frequency of 100 Hz and a duration of 300 ms. To ensure that the  
322 auditory stimulation was at a comfortable level during the experiment, the individual maximum  
323 loudness was determined, for the standard and an oddball tone respectively. An oddball tone  
324 with the maximum possible stimulation frequency of 9990 Hz (based on the used phase  
325 duration of 30  $\mu$ s per phase for sequential biphasic pulses) and a duration of 300 ms was used.  
326 The described routines were implemented using custom scripts and the Palamedes Toolbox  
327 (Prins & Kingdom, 2018). Afterwards, as a functionality check of the measurement setup,  
328 ECAPs were recorded (for further details, see Methods S1; Bahmer et al., 2010). For the  
329 crossmodal attentional task described later, it was necessary that two stimulation frequencies  
330 could be distinguished. Because of interindividual differences when hearing with a CI, it was  
331 necessary to adjust these stimulation frequencies for every participant. Participants were asked,  
332 after hearing a standard and oddball tone, if the first or the second tone had a higher stimulation  
333 frequency. The standard tone had a stimulation frequency of 100 Hz and a duration of 300 ms.  
334 The initial stimulation frequency of the oddball tone (also with a duration of 300 ms) was  
335 determined by the results of the aforementioned maximum loudness procedure. This procedure  
336 was carried out using a Bayesian active sampling protocol to estimate the model parameters of  
337 the psychometric function (Kontsevich & Tyler, 1999; Sanchez et al., 2016) and was

338 implemented with the VBA Toolbox (Daunizeau et al., 2014). To define the individual oddball  
339 stimulation frequency for the subsequent crossmodal attention task, the algorithm searched for  
340 the optimal difference in logarithmic steps from 1 to 9890 Hz and this value was subsequently  
341 added to the standard stimulation frequency. Six participants heard no clear difference and it  
342 was necessary to adjust the oddball stimulation frequency manually, with values between 114  
343 and 600 Hz.

344 The actual experiment was carried out as a crossmodal attention task (see **Figure 1**; similar to  
345 Hartmann & Weisz, 2019) in six blocks, with 85 trials per block. Each trial started with a 500 ms  
346 fixation cross, followed by a cue that indicated either to attend the auditory or the visual  
347 modality. Every block had 43 auditory and 42 visual cues. The cue was a picture of an eye or  
348 ear, presented for 500 ms. A second fixation cross appeared for 1000 ms and the audiovisual  
349 stimulation started afterwards. The auditory stimulation consisted of a 300 ms tone with a  
350 stimulation frequency of 100 Hz and was directly presented via the CI coil. The visual  
351 stimulation was a vertically oriented gabor patch (spatial frequency: 0.01 cycles/pixel, sigma: 60  
352 pixels, phase: 90°), presented for 1300 ms in the center of the screen. In every block, 8 trials  
353 were randomly chosen as visual oddball trials. Independently, another 8 trials were chosen to be  
354 auditory oddball trials. Therefore it was possible that a trial was a visual and auditory oddball  
355 trial simultaneously. In visual oddball trials, the gabor patch tilted 10° to the left, with a random  
356 onset. In auditory oddball trials, a 300 ms tone with the individual oddball stimulation frequency  
357 was presented. Participants had to press the spacebar if the current trial had an oddball in the  
358 cued domain. To account for trials where the visual oddball onset was towards the end of the  
359 stimulation, an additional response time of 300 ms was provided. After each trial, feedback in  
360 the form of a smiley face displayed for 1000 ms, indicated if the response was correct or not. To  
361 ensure correct understanding of and response during the task, participants completed one block  
362 as a practice run before the actual experiment. The total duration of the experiment was about  
363 90 minutes including breaks and preparation.

#### 364 *Recording of hearing nerve activity*

365 We exploit the ability of CIs to record electrical activity from the cochlea in short time windows,  
366 but in contrast to previous approaches (Abbas et al., 2017; Mc Laughlin et al., 2012), in a  
367 stimulus-free cue-target period. Using a custom developed MATLAB toolbox to abstract MAX  
368 Programming Interface commands, we recorded hearing nerve activity via the CI electrode (for

369 bilateral CI users, see Table S1 which side was used). In every participant, the first (i.e. most  
370 apical) electrode was used for the recordings. Each recording window was 1.7 ms long, followed  
371 by a 13.68 ms reset period resulting in a sampling frequency of 65 Hz (1.7 ms recording + 13.68  
372 ms reset time). The technical specifics of the measurement system added a random offset to  
373 each of the recordings (Gaussian noise,  $SD = 0.4$  mV). Because of the USB connection  
374 between the computer and the MAX Programming Interface, the start of the first recording  
375 window had a jitter of 27 ms, but the system sent a highly precise trigger when it started. Due to  
376 technical limitations, it was not possible to record and stimulate simultaneously. We performed  
377 recordings in the 1000 ms prestimulus window (see red line in **Figure 1**).

### 378 *Data preprocessing*

379 The raw data was analyzed in MATLAB 9.8 (The MathWorks, Natick, Massachusetts, USA).  
380 Due to filter artifacts (using the standard filter from the used RIB2 package), the first 100  
381 samples (= 0.083 ms) from every recording window were discarded. Afterwards, the recording  
382 was averaged and treated as one sample point. By repeating these steps for every window and  
383 concatenating the single samples, a recording length of 1 second with a sampling frequency of  
384 65 Hz was reached. The data was further preprocessed with the FieldTrip toolbox (revision  
385 ea6897bb7; Oostenveld et al., 2010) and a bandpass filter between 4 and 25 Hz was applied  
386 (hamming-windowed sinc FIR filter, onepass-zerophase, order: 424, transition width: 0.5 Hz).  
387 For one participant, 15 trials had to be rejected because the CI coil fell off during the last trials of  
388 one block. Only trials with a correct response were analyzed, which were on average 488 trials  
389 ( $SD = 15.8$ ). The number of correct trials was not significantly different between the two  
390 conditions (see Behavioral results).

### 391 *Frequency analysis*

392 Next, data was demeaned, detrended and power spectral density (PSD) from 4 to 25 Hz was  
393 computed on the whole 1000 ms prestimulus window ('mtmfft' implementation in FieldTrip with a  
394 Hann window) separately for the two conditions. For **Figure 2A**, no bandpass filter was applied,  
395 condition-specific power spectra were smoothed (five-point moving average), grand-averaged,  
396 and corrected error bars for within-subjects designs were calculated (O'Brien & Cousineau,  
397 2014).



398 We defined two frequency bands of interest (FOI), theta (5-8 Hz) and alpha (9-13 Hz). Theta  
399 was selected because of previous work on OAEs that showed attentional modulations in this  
400 FOI (Dragicevic et al., 2019; Köhler et al., in press). On a cortical level, previous work showed  
401 that auditory alpha activity reflects attentional processes (Frey et al., 2014; Mazaheri et al.,  
402 2014; Müller & Weisz, 2012; Weise et al., 2016; Weisz et al., 2014; for a review see Weisz et  
403 al., 2011). Therefore, we decided to analyze this FOI at the cochlear level.

404 To test the hypothesis that power was higher when the auditory domain was attended, statistical  
405 testing of PSD was performed with a cluster-based permutation test (dependent samples t-test,  
406 10000 randomizations, one-tailed; Maris & Oostenveld, 2007). We averaged the theta and alpha  
407 FOI and tested them separately.

#### 408 *Decoding analysis*

409 For decoding of attended modality on a single-trial basis, we performed k-nearest neighbors  
410 (kNN) classification of single-trial power spectra using scikit-learn (Version 0.23.1 running on  
411 Python 3.7.7; Pedregosa et al., 2011) separately for a broadband signal (4-25 Hz) followed by  
412 standard frequency bands associated with selective attention (theta: 5-8 Hz, alpha: 9-13 Hz,  
413 beta: 14-24 Hz). We decided to use the kNN classification approach as data was recorded from  
414 a single CI channel over a one second period resulting in low numbers of features (i.e.  
415 frequency points per band), a classification problem usually solved better by a kNN approach  
416 (Eisa et al., 2018). At first, a subject's data was standardized to unit variance and zero mean.  
417 For the classification process of each subject, the best number of neighbors was determined by  
418 searching the hyper-parameter space for the best cross-validation (CV) score of a kNN model  
419 using the implemented *GridSearchCV* function with a 2-fold CV on shuffled class samples  
420 (*StratifiedKfold(shuffle=True)*) that was fit to the data for every FOI. Our decision for a 2-fold CV  
421 was based on recommendations in case of low sample / effect size data (Jamalabadi et al.,  
422 2016). The numbers of neighbors to use during the gridsearch were defined as ranging from  
423 one to 10% of trials in the dataset in odd numbers (1, trials/10, stepsize=2) to avoid the conflict  
424 of even neighbors in a two-class problem (attend auditory vs. visual). Given the novel approach,  
425 we could not exclude that the classifier would pick up on a few outlying data points. In order to  
426 address this issue explicitly, the classifier was tested on the same noisy data, albeit with  
427 randomly shuffled condition labels. Samples were thus classified and tested for significance with

428 the best scoring number of neighbors in a 1000 random permutation test and the 2-fold CV  
429 procedure.

430 The resulting *Observed* and *Chance* accuracy values (where chance level was calculated as the  
431 mean accuracy of the 1000 random permutation scores) for every FOI were then statistically  
432 tested using pingouin (Version 0.3.8 running on Python 3.7.7; Vallat, 2018). In a first step, to test  
433 whether hearing nerve modulation was generally reflected within classification results,  
434 broadband values (*Observed* vs. *Chance*) were compared using a one-sided t-test. Then,  
435 classification results of all four FOI were compared in a two-factor repeated measures ANOVA  
436 with the factors *FOI* (broadband, theta, alpha, beta) and *Type* (*Observed* vs. *Chance*) to check  
437 whether the attention effect was driven by one of the predefined FOI. Finally, theta, alpha, and  
438 beta bands were also tested for significant differences during focused attention computing three  
439 one-sided t-tests with respective values (*Observed* vs. *Chance*).

#### 440 **Acknowledgments**

441 The authors would like to thank Agnes Koller and Lisa Niederwanger for their help in recruiting  
442 participants. Quirin Gehmacher and Patrick Reisinger are supported by the Austrian Research  
443 Promotion Agency (FFG; BRIDGE 1 project "SmartCIs"; 871232) and the Austrian Science  
444 Fund (FWF; Doctoral College "Imaging the Mind"; W 1233-B).

#### 445 **Author Contributions**

446 Q.G. and P.R. collected and analyzed data, generated the figures, and wrote the manuscript.  
447 T.H. designed the experiment, collected and analyzed data, developed analysis methods, and  
448 edited the manuscript. T.K. and S.R. recruited participants and consulted on the clinical aspects.  
449 K.S. developed analysis methods, provided input on data analysis, and edited the manuscript.  
450 N.W. acquired the funding, supervised the project, and edited the manuscript.

#### 451 **Declaration of Interests**

452 K.S. is an employee of MED-EL GmbH. All other authors declare no competing interests.

## 453 **References**

- 454 Abbas, P. J., Brown, C. J., Shallop, J. K., Firszt, J. B., Hughes, M. L., Hong, S. H., & Staller, S.  
455 J. (1999). Summary of Results Using the Nucleus CI24M Implant to Record the  
456 Electrically Evoked Compound Action Potential. *Ear and Hearing*, 20(1), 45–59.  
457 <https://doi.org/10.1097/00003446-199902000-00005>
- 458 Abbas, P. J., Tejani, V. D., Scheperle, R. A., & Brown, C. J. (2017). Using Neural Response  
459 Telemetry to Monitor Physiological Responses to Acoustic Stimulation in Hybrid  
460 Cochlear Implant Users. *Ear and Hearing*, 38(4), 409.  
461 <https://doi.org/10.1097/AUD.0000000000000400>
- 462 Antonov, P. A., Chakravarthi, R., & Andersen, S. K. (2020). Too little, too late, and in the wrong  
463 place: Alpha band activity does not reflect an active mechanism of selective attention.  
464 *NeuroImage*, 219, 117006. <https://doi.org/10.1016/j.neuroimage.2020.117006>
- 465 Bahmer, A., Peter, O., & Baumann, U. (2010). Recording and analysis of electrically evoked  
466 compound action potentials (ECAPs) with MED-EL cochlear implants and different  
467 artifact reduction strategies in Matlab. *Journal of Neuroscience Methods*, 191(1), 66–74.  
468 <https://doi.org/10.1016/j.jneumeth.2010.06.008>
- 469 Brainard, D. H. (1997). The Psychophysics Toolbox. *Spatial Vision*, 10(4), 433–436.  
470 <https://doi.org/10.1163/156856897X00357>
- 471 Campbell, L., Kaicer, A., Briggs, R., & O'Leary, S. (2015). Cochlear Response Telemetry:  
472 Intracochlear Electrocochleography via Cochlear Implant Neural Response Telemetry  
473 Pilot Study Results. *Otology & Neurotology*, 36(3), 399.  
474 <https://doi.org/10.1097/MAO.0000000000000678>
- 475 Chandrasekaran, B., & Kraus, N. (2010). The scalp-recorded brainstem response to speech:  
476 Neural origins and plasticity. *Psychophysiology*, 47(2), 236–246.

- 477 <https://doi.org/10.1111/j.1469-8986.2009.00928.x>
- 478 Christov, F., Munder, P., Berg, L., Bagus, H., Lang, S., & Arweiler-Harbeck, D. (2016). ECAP  
479 analysis in cochlear implant patients as a function of patient's age and electrode-design.  
480 *European Annals of Otorhinolaryngology, Head and Neck Diseases*, 133, S1–S3.  
481 <https://doi.org/10.1016/j.anorl.2016.04.015>
- 482 Daunizeau, J., Adam, V., & Rigoux, L. (2014). VBA: A Probabilistic Treatment of Nonlinear  
483 Models for Neurobiological and Behavioural Data. *PLOS Computational Biology*, 10(1),  
484 e1003441. <https://doi.org/10.1371/journal.pcbi.1003441>
- 485 Delano, P. H., Elgueda, D., Hamame, C. M., & Robles, L. (2007). Selective Attention to Visual  
486 Stimuli Reduces Cochlear Sensitivity in Chinchillas. *Journal of Neuroscience*, 27(15),  
487 4146–4153. <https://doi.org/10.1523/JNEUROSCI.3702-06.2007>
- 488 Dragicevic, C. D., Marcenaro, B., Navarrete, M., Robles, L., & Delano, P. H. (2019). Oscillatory  
489 infrasonic modulation of the cochlear amplifier by selective attention. *PLOS ONE*, 14(1),  
490 e0208939. <https://doi.org/10.1371/journal.pone.0208939>
- 491 Eisa, D. A., Taloba, A. I., & Ismail, S. S. I. (2018). A Comparative Study on using Principle  
492 Component Analysis with different Text Classifiers. *International Journal of Computer  
493 Applications*, 180(31), 1–6. <https://doi.org/10.5120/ijca2018916800>
- 494 Elgueda, D., & Delano, P. H. (2020). Corticofugal modulation of audition. *Current Opinion in  
495 Physiology*, 18, 73–78. <https://doi.org/10.1016/j.cophys.2020.08.016>
- 496 Elgueda, D., Delano, P. H., & Robles, L. (2011). Effects of Electrical Stimulation of Olivocochlear  
497 Fibers in Cochlear Potentials in the Chinchilla. *Journal of the Association for Research in  
498 Otolaryngology*, 12(3), 317–327. <https://doi.org/10.1007/s10162-011-0260-9>
- 499 Foxe, J. J., & Snyder, A. C. (2011). The Role of Alpha-Band Brain Oscillations as a Sensory  
500 Suppression Mechanism during Selective Attention. *Frontiers in Psychology*, 2.

- 501 <https://doi.org/10.3389/fpsyg.2011.00154>
- 502 Francis, N. A., Zhao, W., & Guinan Jr., J. J. (2018). Auditory Attention Reduced Ear-Canal  
503 Noise in Humans by Reducing Subject Motion, Not by Medial Olivocochlear Efferent  
504 Inhibition: Implications for Measuring Otoacoustic Emissions During a Behavioral Task.  
505 *Frontiers in Systems Neuroscience*, 12. <https://doi.org/10.3389/fnsys.2018.00042>
- 506 Frey, J. N., Mainy, N., Lachaux, J.-P., Müller, N., Bertrand, O., & Weisz, N. (2014). Selective  
507 Modulation of Auditory Cortical Alpha Activity in an Audiovisual Spatial Attention Task.  
508 *Journal of Neuroscience*, 34(19), 6634–6639.  
509 <https://doi.org/10.1523/JNEUROSCI.4813-13.2014>
- 510 Gazzaley, A., & Nobre, A. C. (2012). Top-down modulation: Bridging selective attention and  
511 working memory. *Trends in Cognitive Sciences*, 16(2), 129–135.  
512 <https://doi.org/10.1016/j.tics.2011.11.014>
- 513 Giard, M.-H., Collet, L., Bouchet, P., & Pernier, J. (1994). Auditory selective attention in the  
514 human cochlea. *Brain Research*, 633(1), 353–356.  
515 [https://doi.org/10.1016/0006-8993\(94\)91561-X](https://doi.org/10.1016/0006-8993(94)91561-X)
- 516 Haegens, S., Nácher, V., Luna, R., Romo, R., & Jensen, O. (2011).  $\alpha$ -Oscillations in the monkey  
517 sensorimotor network influence discrimination performance by rhythmical inhibition of  
518 neuronal spiking. *Proceedings of the National Academy of Sciences*, 108(48),  
519 19377–19382. <https://doi.org/10.1073/pnas.1117190108>
- 520 Händel, B. F., Haarmeier, T., & Jensen, O. (2010). Alpha Oscillations Correlate with the  
521 Successful Inhibition of Unattended Stimuli. *Journal of Cognitive Neuroscience*, 23(9),  
522 2494–2502. <https://doi.org/10.1162/jocn.2010.21557>
- 523 Hartmann, T., & Weisz, N. (2019). Auditory cortical generators of the Frequency Following  
524 Response are modulated by intermodal attention. *NeuroImage*, 203, 116185.

- 525 <https://doi.org/10.1016/j.neuroimage.2019.116185>
- 526 Hartmann, T., & Weisz, N. (2020). An introduction to the Objective Psychophysics Toolbox.  
527 *Frontiers in Psychology, 11*. <https://doi.org/10.3389/fpsyg.2020.585437>
- 528 He, S., Teagle, H. F. B., & Buchman, C. A. (2017). The electrically evoked compound action  
529 potential: From laboratory to clinic. *Frontiers in Neuroscience, 11*.  
530 <https://doi.org/10.3389/fnins.2017.00339>
- 531 Jackson, J., Rich, A. N., Williams, M. A., & Woolgar, A. (2016). Feature-selective Attention in  
532 Frontoparietal Cortex: Multivoxel Codes Adjust to Prioritize Task-relevant Information.  
533 *Journal of Cognitive Neuroscience, 29*(2), 310–321.  
534 [https://doi.org/10.1162/jocn\\_a\\_01039](https://doi.org/10.1162/jocn_a_01039)
- 535 Jamalabadi, H., Alizadeh, S., Schönauer, M., Leibold, C., & Gais, S. (2016). Classification  
536 based hypothesis testing in neuroscience: Below-chance level classification rates and  
537 overlooked statistical properties of linear parametric classifiers. *Human Brain Mapping,*  
538 *37*(5), 1842–1855. <https://doi.org/10.1002/hbm.23140>
- 539 Kim, J.-R., Abbas, P. J., Brown, C. J., Etler, C. P., O'Brien, S., & Kim, L.-S. (2010). The  
540 Relationship Between Electrically Evoked Compound Action Potential and Speech  
541 Perception: A Study in Cochlear Implant Users With Short Electrode Array. *Otology &*  
542 *Neurotology, 31*(7), 1041–1048. <https://doi.org/10.1097/MAO.0b013e3181ec1d92>
- 543 Kleiner, M., Brainard, D., & Pelli, D. (2007). What's new in Psychtoolbox-3? *Perception, 36,*  
544 1–16.
- 545 Köhler, M. H. A., Demarchi, G., & Weisz, N. (in press). Cochlear activity in silent cue-target  
546 intervals shows a theta-rhythmic pattern and is correlated to attentional alpha and theta  
547 modulations. *BMC Biology*.
- 548 Kontsevich, L. L., & Tyler, C. W. (1999). Bayesian adaptive estimation of psychometric slope



- 549 and threshold. *Vision Research*, 39(16), 2729–2737.
- 550 [https://doi.org/10.1016/S0042-6989\(98\)00285-5](https://doi.org/10.1016/S0042-6989(98)00285-5)
- 551 Litovsky, R. Y., Goupell, M. J., Kan, A., & Landsberger, D. M. (2017). Use of Research  
552 Interfaces for Psychophysical Studies With Cochlear-Implant Users. *Trends in Hearing*,  
553 21, 2331216517736464. <https://doi.org/10.1177/2331216517736464>
- 554 Loizou, P. C., Hu, Y., Litovsky, R., Yu, G., Peters, R., Lake, J., & Roland, P. (2009). Speech  
555 recognition by bilateral cochlear implant users in a cocktail-party setting. *The Journal of*  
556 *the Acoustical Society of America*, 125(1), 372–383. <https://doi.org/10.1121/1.3036175>
- 557 Lopez-Poveda, E. A., Eustaquio-Martín, A., Stohl, J. S., Wolford, R. D., Schatzer, R., & Wilson,  
558 B. S. (2016). A Binaural Cochlear Implant Sound Coding Strategy Inspired by the  
559 Contralateral Medial Olivocochlear Reflex. *Ear and Hearing*, 37(3), e138.  
560 <https://doi.org/10.1097/AUD.0000000000000273>
- 561 Maison, S., Micheyl, C., & Collet, L. (2001). Influence of focused auditory attention on cochlear  
562 activity in humans. *Psychophysiology*, 38(1), 35–40.  
563 <https://doi.org/10.1111/1469-8986.3810035>
- 564 Maris, E., & Oostenveld, R. (2007). Nonparametric statistical testing of EEG- and MEG-data.  
565 *Journal of Neuroscience Methods*, 164(1), 177–190.  
566 <https://doi.org/10.1016/j.jneumeth.2007.03.024>
- 567 Mazaheri, A., van Schouwenburg, M. R., Dimitrijevic, A., Denys, D., Cools, R., & Jensen, O.  
568 (2014). Region-specific modulations in oscillatory alpha activity serve to facilitate  
569 processing in the visual and auditory modalities. *NeuroImage*, 87, 356–362.  
570 <https://doi.org/10.1016/j.neuroimage.2013.10.052>
- 571 Mc Laughlin, M., Lu, T., Dimitrijevic, A., & Zeng, F. (2012). Towards a Closed-Loop Cochlear  
572 Implant System: Application of Embedded Monitoring of Peripheral and Central Neural

- 573 Activity. *IEEE Transactions on Neural Systems and Rehabilitation Engineering*, 20(4),  
574 443–454. <https://doi.org/10.1109/TNSRE.2012.2186982>
- 575 Miller, C. A., Brown, C. J., Abbas, P. J., & Chi, S.-L. (2008). The clinical application of potentials  
576 evoked from the peripheral auditory system. *Hearing Research*, 242(1), 184–197.  
577 <https://doi.org/10.1016/j.heares.2008.04.005>
- 578 Müller, N., & Weisz, N. (2012). Lateralized Auditory Cortical Alpha Band Activity and  
579 Interregional Connectivity Pattern Reflect Anticipation of Target Sounds. *Cerebral*  
580 *Cortex*, 22(7), 1604–1613. <https://doi.org/10.1093/cercor/bhr232>
- 581 Nelissen, N., Stokes, M., Nobre, A. C., & Rushworth, M. F. S. (2013). Frontal and Parietal  
582 Cortical Interactions with Distributed Visual Representations during Selective Attention  
583 and Action Selection. *Journal of Neuroscience*, 33(42), 16443–16458.  
584 <https://doi.org/10.1523/JNEUROSCI.2625-13.2013>
- 585 O'Brien, F., & Cousineau, D. (2014). Representing Error bars in within-subject designs in typical  
586 software packages. *The Quantitative Methods for Psychology*, 10(1), 56–67.  
587 <https://doi.org/10.20982/tqmp.10.1.p056>
- 588 Oostenveld, R., Fries, P., Maris, E., & Schoffelen, J.-M. (2010). FieldTrip: Open Source Software  
589 for Advanced Analysis of MEG, EEG, and Invasive Electrophysiological Data.  
590 *Computational Intelligence and Neuroscience*, 2011, 156869.  
591 <https://doi.org/10.1155/2011/156869>
- 592 Pedregosa, F., Varoquaux, G., Gramfort, A., Michel, V., Thirion, B., Grisel, O., Blondel, M.,  
593 Prettenhofer, P., Weiss, R., Dubourg, V., Vanderplas, J., Passos, A., Cournapeau, D.,  
594 Brucher, M., Perrot, M., & Duchesnay, É. (2011). Scikit-learn: Machine Learning in  
595 Python. *Journal of Machine Learning Research*, 12(85), 2825–2830.
- 596 Pelli, D. G. (1997). The VideoToolbox software for visual psychophysics: Transforming numbers

- 597 into movies. *Spatial Vision*, 10(4), 437–442. <https://doi.org/10.1163/156856897X00366>
- 598 Posner, M. I. (1980). Orienting of Attention. *Quarterly Journal of Experimental Psychology*,
- 599 32(1), 3–25. <https://doi.org/10.1080/00335558008248231>
- 600 Prins, N., & Kingdom, F. A. A. (2018). Applying the Model-Comparison Approach to Test
- 601 Specific Research Hypotheses in Psychophysical Research Using the Palamedes
- 602 Toolbox. *Frontiers in Psychology*, 9. <https://doi.org/10.3389/fpsyg.2018.01250>
- 603 Ramekers, D., Versnel, H., Strahl, S. B., Smeets, E. M., Klis, S. F. L., & Grolman, W. (2014).
- 604 Auditory-Nerve Responses to Varied Inter-Phase Gap and Phase Duration of the Electric
- 605 Pulse Stimulus as Predictors for Neuronal Degeneration. *Journal of the Association for*
- 606 *Research in Otolaryngology*, 15(2), 187–202. <https://doi.org/10.1007/s10162-013-0440-x>
- 607 Salo, E., Salmela, V., Salmi, J., Numminen, J., & Alho, K. (2017). Brain activity associated with
- 608 selective attention, divided attention and distraction. *Brain Research*, 1664, 25–36.
- 609 <https://doi.org/10.1016/j.brainres.2017.03.021>
- 610 Sanchez, G., Lecaigard, F., Otman, A., Maby, E., & Mattout, J. (2016). Active SAmpling
- 611 Protocol (ASAP) to Optimize Individual Neurocognitive Hypothesis Testing: A
- 612 BCI-Inspired Dynamic Experimental Design. *Frontiers in Human Neuroscience*, 10.
- 613 <https://doi.org/10.3389/fnhum.2016.00347>
- 614 Sauseng, P., Klimesch, W., Stadler, W., Schabus, M., Doppelmayr, M., Hanslmayr, S., Gruber,
- 615 W. R., & Birbaumer, N. (2005). A shift of visual spatial attention is selectively associated
- 616 with human EEG alpha activity. *European Journal of Neuroscience*, 22(11), 2917–2926.
- 617 <https://doi.org/10.1111/j.1460-9568.2005.04482.x>
- 618 Stypulkowski, P. H., & van den Honert, C. (1984). Physiological properties of the electrically
- 619 stimulated auditory nerve. I. Compound action potential recordings. *Hearing Research*,
- 620 14(3), 205–223. [https://doi.org/10.1016/0378-5955\(84\)90051-0](https://doi.org/10.1016/0378-5955(84)90051-0)

- 621 Suga, N. (2008). Role of corticofugal feedback in hearing. *Journal of Comparative Physiology A*,  
622 194(2), 169–183. <https://doi.org/10.1007/s00359-007-0274-2>
- 623 Tejani, V. D., Abbas, P. J., Brown, C. J., & Woo, J. (2019). An improved method of obtaining  
624 electrocochleography recordings from Nucleus Hybrid cochlear implant users. *Hearing*  
625 *Research*, 373, 113–120. <https://doi.org/10.1016/j.heares.2019.01.002>
- 626 Terreros, G., & Delano, P. H. (2015). Corticofugal modulation of peripheral auditory responses.  
627 *Frontiers in Systems Neuroscience*, 9. <https://doi.org/10.3389/fnsys.2015.00134>
- 628 Vallat, R. (2018). Pingouin: Statistics in Python. *Journal of Open Source Software*, 3(31), 1026.  
629 <https://doi.org/10.21105/joss.01026>
- 630 Warr, W. B., & Guinan, J. J. (1979). Efferent innervation of the organ of corti: Two separate  
631 systems. *Brain Research*, 173(1), 152–155.  
632 [https://doi.org/10.1016/0006-8993\(79\)91104-1](https://doi.org/10.1016/0006-8993(79)91104-1)
- 633 Weise, A., Hartmann, T., Schröger, E., Weisz, N., & Ruhnau, P. (2016). Cross-modal distractors  
634 modulate oscillatory alpha power: The neural basis of impaired task performance.  
635 *Psychophysiology*, 53(11), 1651–1659. <https://doi.org/10.1111/psyp.12733>
- 636 Weisz, N., Hartmann, T., Müller, N., & Obleser, J. (2011). Alpha Rhythms in Audition: Cognitive  
637 and Clinical Perspectives. *Frontiers in Psychology*, 2.  
638 <https://doi.org/10.3389/fpsyg.2011.00073>
- 639 Weisz, N., Müller, N., Jatzev, S., & Bertrand, O. (2014). Oscillatory Alpha Modulations in Right  
640 Auditory Regions Reflect the Validity of Acoustic Cues in an Auditory Spatial Attention  
641 Task. *Cerebral Cortex*, 24(10), 2579–2590. <https://doi.org/10.1093/cercor/bht113>
- 642 Winer, J. A. (2006). Decoding the auditory corticofugal systems. *Hearing Research*, 212(1), 1–8.  
643 <https://doi.org/10.1016/j.heares.2005.06.014>
- 644 Wittekindt, A., Kaiser, J., & Abel, C. (2014). Attentional Modulation of the Inner Ear: A Combined

645 Otoacoustic Emission and EEG Study. *Journal of Neuroscience*, 34(30), 9995–10002.

646 <https://doi.org/10.1523/JNEUROSCI.4861-13.2014>

647 Woolgar, A., Williams, M. A., & Rich, A. N. (2015). Attention enhances multi-voxel

648 representation of novel objects in frontal, parietal and visual cortices. *NeuroImage*, 109,

649 429–437. <https://doi.org/10.1016/j.neuroimage.2014.12.083>

## 650 Supplemental Information

### 651 Methods S1: Details on electrically evoked compound action potentials (ECAPs)

652 ECAPs were biphasic pulses (anodal polarity of the first pulse phase) with a 40  $\mu$ s phase  
653 duration and an 147  $\mu$ s interpulse interval. In each participant, the first (i.e. most apical)  
654 electrode was used for stimulation and the second for recording. Phase amplitudes and amount  
655 of ECAPs measured in each participant were defined between the minimum amplitude given by  
656 the electrical hearing threshold and the maximum amplitude given by the maximum loudness of  
657 the standard tone (phase amplitude: in steps of 9.45 current units (CU); amount: in steps of  
658 one).

| Age | Date(s) of implantation | Deafness onset | Reason(s)                                               | CI model(s)      | Side (used)  | Residual hearing |
|-----|-------------------------|----------------|---------------------------------------------------------|------------------|--------------|------------------|
| 53  | Unknown                 | Unknown        | Unknown                                                 | Unknown          | Left         | No               |
| 51  | Unknown                 | Unknown        | Unknown                                                 | Unknown          | Both (left)  | No               |
| 44  | 02/2018                 | Postlingual    | Unknown                                                 | RONDO 2          | Right        | Yes              |
| 37  | 04/2018                 | Postlingual    | Stroke                                                  | RONDO 2          | Right        | Yes              |
| 52  | 10/2015, 12/2016        | Postlingual    | Sudden deafness                                         | SONNET           | Both (left)  | No               |
| 42  | 01/2018, 01/2019        | Postlingual    | Perinatal complications                                 | RONDO 2          | Both (right) | No               |
| 56  | 01/2020                 | Postlingual    | Hearing loss in higher frequencies                      | SONNET 2         | Right        | Yes              |
| 38  | 07/2011, 08/2020        | Postlingual    | Sudden deafness (left), middle ear inflammation (right) | SONNET 2         | Both (left)  | Yes              |
| 64  | 04/2019                 | Postlingual    | Unknown                                                 | RONDO 2          | Left         | Yes              |
| 57  | 06/2018, 06/2019        | Postlingual    | Age-related hearing loss                                | SONNET 2 (left), | Both (right) | No               |



|    |                     |             |                             |                   |                |     |
|----|---------------------|-------------|-----------------------------|-------------------|----------------|-----|
|    |                     |             |                             | SONNET<br>(right) |                |     |
| 74 | 12/2002,<br>08/2012 | Postlingual | Otitis                      | SONNET<br>2       | Both<br>(left) | No  |
| 78 | 01/2020             | Postlingual | Age-related hearing<br>loss | SONNET<br>2       | Left           | No  |
| 57 | 08/2014             | Postlingual | Sudden deafness             | RONDO 2           | Right          | Yes |
| 70 | 09/2017             | Postlingual | Sudden deafness             | SONNET            | Right          | No  |
| 52 | 06/2014             | Postlingual | Age-related hearing<br>loss | SONNET            | Left           | Yes |
| 55 | 09/2014,<br>09/2016 | Prelingual  | Congenital deafness         | SONNET            | Both<br>(left) | No  |

659 **Table S1.** *Overview of CI subjects.* Age (in years) is at the time of the experiment session. In the first two  
660 participants, only the age and data of the used side was collected.
